# Supplementary material for: Intestinal Shedding of SARS-CoV-2 in Children: No Evidence for Infectious Potential
Source: MDPI journal article supplement (doi:10.3390/microorganisms11010033), 2022-12-22
Supplement: s1 [file s1]

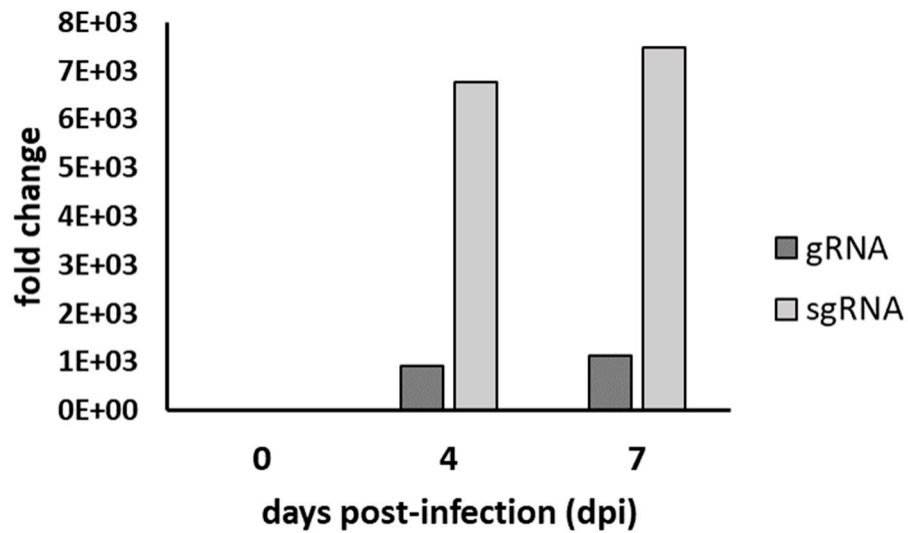

**Figure S1. Positive controls used for SARS-CoV-2 gRNA and sgRNA detection in infected stool samples.** Quantification of gRNA and sgRNA in specimens taken at 0, 4 and 7 dpi from Vero-E6 cell culture incubated with SARS-CoV-2 derived from stool specimens. The viral loads are indicated as fold change normalized to the 0 dpi sample.
